# Supplementary material
Source: PubMed Central journal article supplement (PMC7927865)
Supplement: AAC.01466-20-s0001.pdf [file AAC.01466-20-s0001.pdf]

1 Supplemental Materials

2

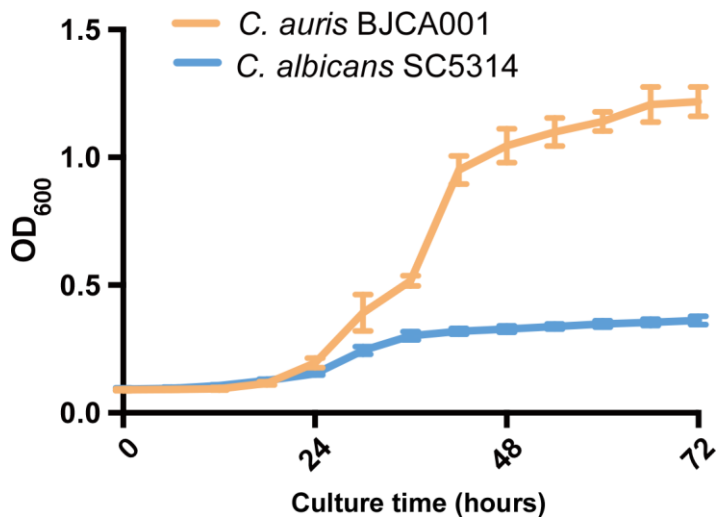

3

4

5 **Figure S1. Growth curves of *C. auris* (BJCA001) and *C. albicans***  
6 **(SC5314) in RPMI 1640 medium containing 32 mg/L fluconazole. 500 cells**  
7 were inoculated into 0.2 mL fresh medium and grown at 35°C. Three  
8 biological repeats were performed. X-axis, incubation time; Y-axis, value of  
9 fungal OD600.

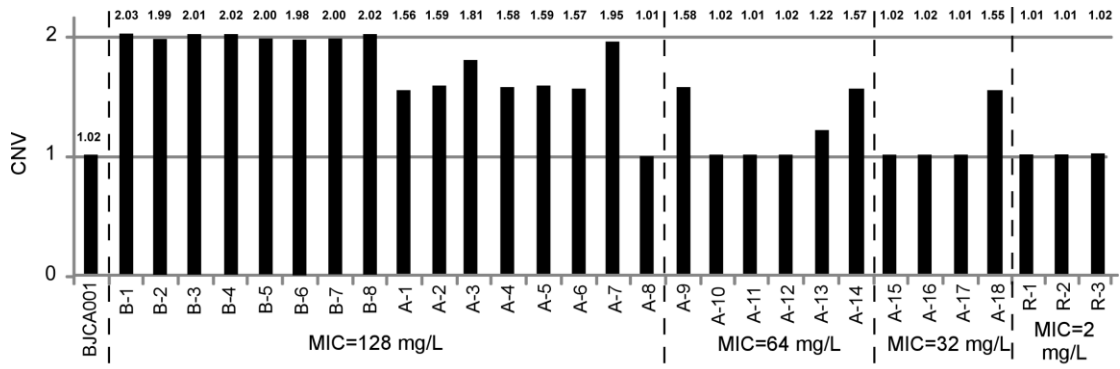

10

11

12 **Figure S2. Copy-number variation of Scaffold 6 (Chromosome V) of**

13 **experimentally evolved strains of *C. auris* A1 to A18 and B1 to B8.**

14 Fluconazole-susceptible strain BJCA001 served as a control. The MIC value to

15 fluconazole of each isolate was shown.

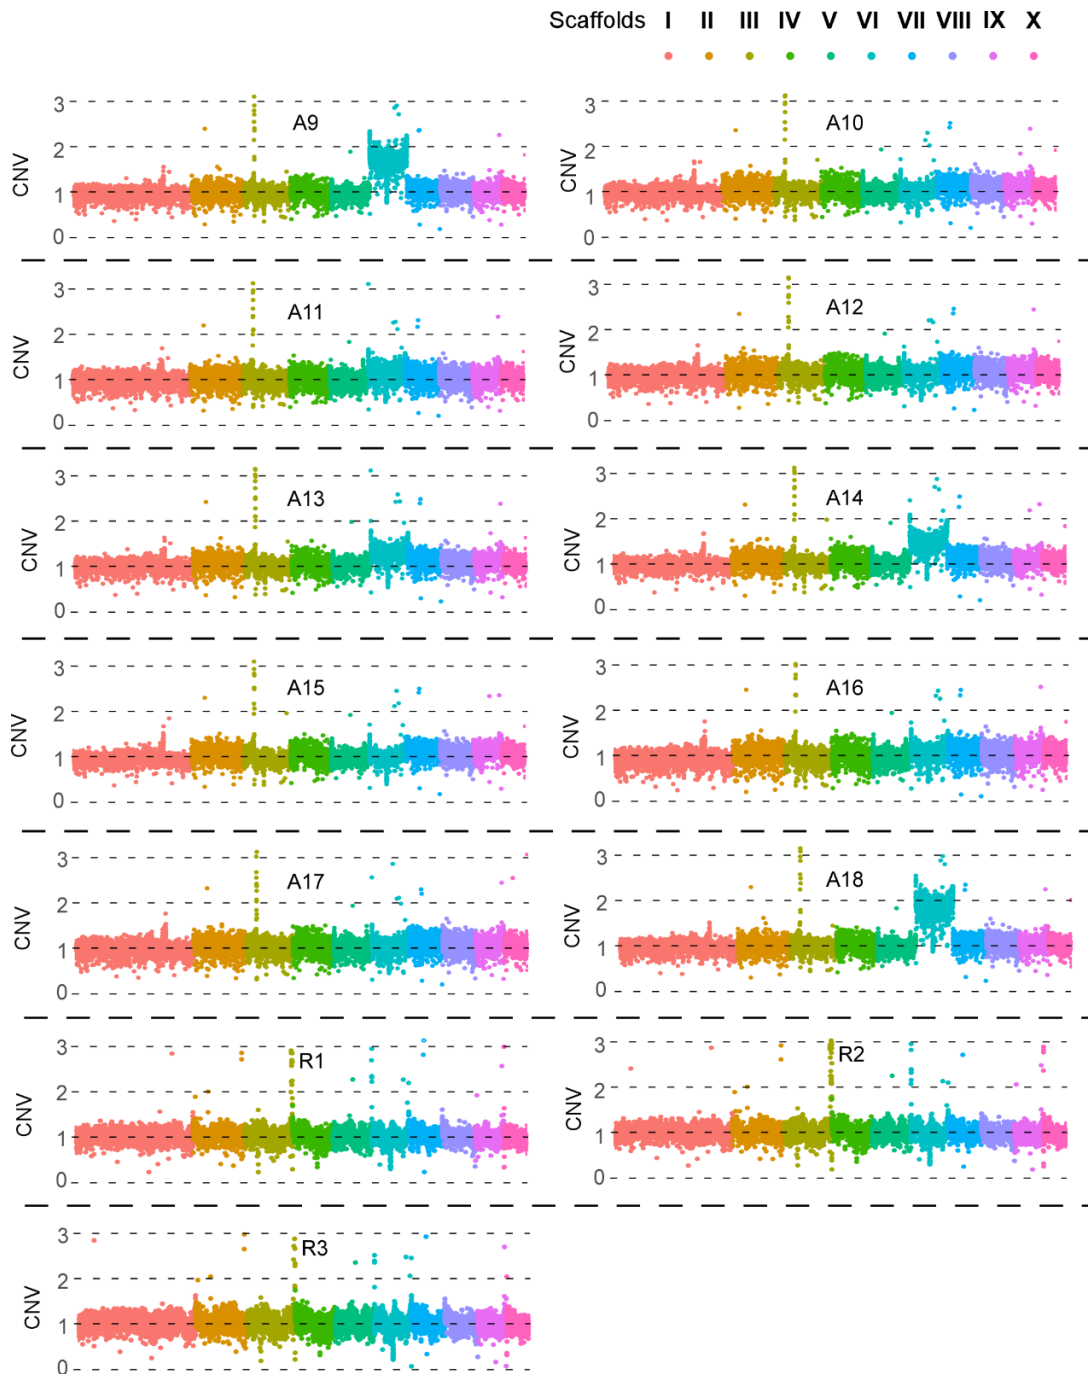

17 **Figure S3. Genome wide Copy-number variations (CNV) for strains A9-**  
 18 **A18, and R1-R3.** A comparative genomic analysis shows a copy number  
 19 variation at Scaffold 6 (Chromosome V) using the B8441 genome assembly as  
 20 a reference. The x-axis indicates Scaffolds 1 to 10. The y-axis denotes the copy  
 21 number of each scaffold. Each spot represents the sequence depth for a  
 22 genomic segment of 500 bp across the chromosomes.

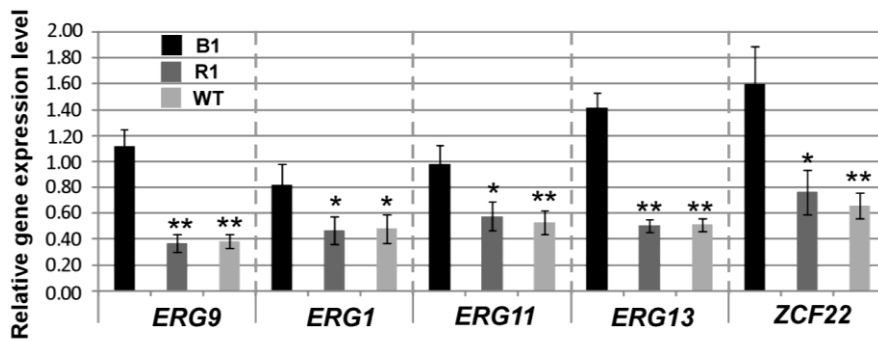

23

24 **Figure S4. Relative gene expression levels of ergosterol biosynthesis-**  
 25 **related genes in cells of strains B1, R1, and BJCA001. Relative**  
 26 **transcriptional expression levels of *ERG13*, *ERG9*, *ERG1*, *ERG11*, and *ZCF22*.**  
 27 **Error bars, standard errors of technical duplicates. \*p<0.05, \*\*p<0.01 (two tailed**  
 28 **Student's *t*-test).**

29 **Dataset S1. Whole genomic SNPs among strains BJCA001, A1 to A18, B1**  
30 **to B8, and R1 to R3.**

31

32 **Dataset S2. The depth of 500bp-window for strains BJCA001, A1 to A18,**  
33 **B1 to B8, and R1 to R3.**

34

35 **Dataset S3. RNA-Seq dataset.**
